# Supplementary material for: Fuzzy-FishNET: a highly reproducible protein complex-based approach for feature selection in comparative proteomics
Source: PubMed Central journal article supplement (PMC5260792; doi:10.1186/s12920-016-0228-z), 2016-12-05

**Additional File 2** Recall distributions for several network-based methods for three simulated datasets (D1.2, D2.2 and RC1) at three levels of purity (50, 75 and 100%).

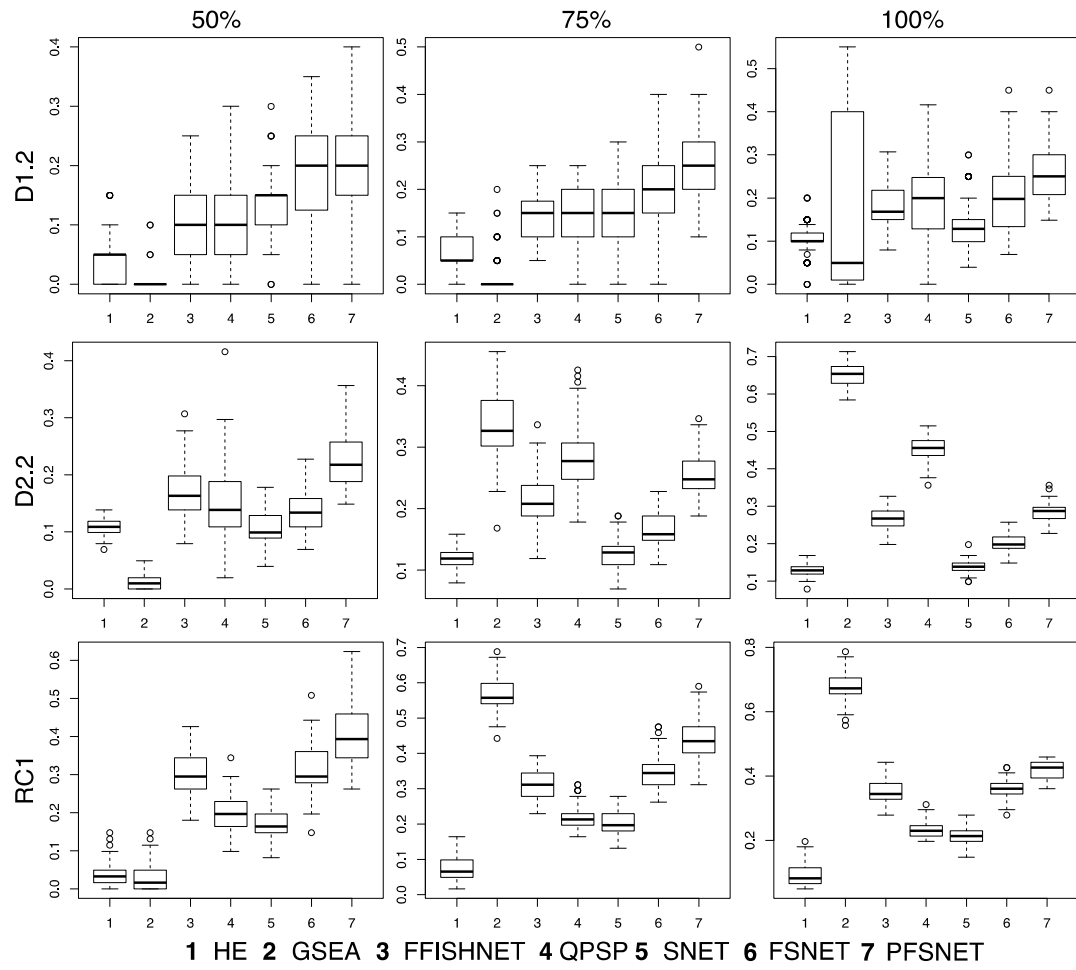

Supplement: 12920_2016_228_MOESM2_ESM.pdf [file 12920_2016_228_MOESM2_ESM.pdf]
