# Supplementary material for: Fuzzy-FishNET: a highly reproducible protein complex-based approach for feature selection in comparative proteomics
Source: PubMed Central journal article supplement (PMC5260792; doi:10.1186/s12920-016-0228-z), 2016-12-05
Supplement: 12920_2016_228_MOESM3_ESM.pdf [file 12920_2016_228_MOESM3_ESM.pdf]

**Additional File 3** Top 25 Fuzzy-FishNET complexes

| <b>Complex ID</b> | <b>Complex Name</b>                      | <b>P-value</b> | <b>Functions</b>                                   |
|-------------------|------------------------------------------|----------------|----------------------------------------------------|
| 306               | Ribosome, cytoplasmic                    | 8.85E-48       | protein biosynthesis                               |
| 3055              | Nop56p-associated pre-rRNA complex       | 1.06E-40       | ribosome biogenesis                                |
| 308               | 60S ribosomal subunit, cytoplasmic       | 5.88E-31       | protein biosynthesis                               |
| 5380              | TRBP containing complex                  | 4.86E-19       | regulation of translation                          |
| 338               | 40S ribosomal subunit, cytoplasmic       | 7.38E-19       | protein biosynthesis                               |
| 1181              | C complex spliceosome                    | 1.53E-14       | rNA splicing                                       |
| 351               | Spliceosome                              | 2.93E-14       | rNA splicing                                       |
| 193               | PA700-20S-PA28 complex                   | 6.15E-14       | proteasomal ubiquitin-dependent protein catabolism |
| 181               | 26S proteasome                           | 6.69E-12       | response to stress                                 |
| 191               | 20S proteasome                           | 7.79E-11       | response to stress                                 |
| 194               | PA28gamma-20S proteasome                 | 1.30E-10       | response to stress                                 |
| 5266              | TNF-alpha/NF-kappa B signaling complex 6 | 3.12E-10       | I-kappaB kinase/NF-kappaB cascade                  |
| 1068              | 12S U11 snRNP                            | 8.60E-10       | nuclear mRNA splicing, via spliceosome             |
| 2174              | COP9 signalosome complex                 | 1.12E-09       | signal transduction                                |
| 192               | PA28-20S proteasome                      | 1.52E-09       | response to stress                                 |
| 32                | PA700 complex                            | 2.49E-09       | proteasomal ubiquitin-dependent protein catabolism |
| 3040              | Multisynthetase complex                  | 3.47E-08       | tRNA ligase activity                               |
| 1737              | SF3b complex                             | 2.94E-07       | RNA splicing                                       |
| 3082              | DGCR8 multiprotein complex               | 1.50E-06       | RNA processing                                     |
| 5613              | Emerin complex 25                        | 3.39E-06       | intracellular signaling cascade                    |
| 112               | Prefoldin complex                        | 3.52E-06       | cytoskeleton organization and biogenesis           |
| 5232              | TNF-alpha/Nf-kappa B signaling complex   | 5.12E-06       | I-kappaB kinase/NF-kappaB cascade                  |
| 1183              | CDC5L complex                            | 5.26E-05       | RNA splicing                                       |
| 5199              | Kinase maturation complex 1              | 5.55E-05       | protein kinase cascade                             |
| 27                | Arp2/3 protein complex                   | 7.89E-05       | actin cytoskeleton organization and biogenesis     |
